# Supplementary material
Source: PubMed Central journal article supplement (PMC1794278)
Supplement: pnas_0608745104_1.pdf [file pnas_0608745104_1.pdf]

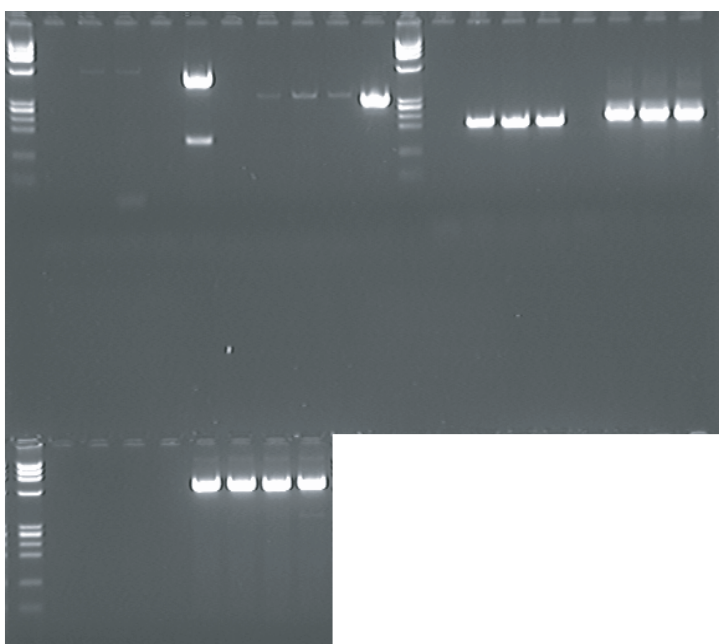

|    |                              |                                 |
|----|------------------------------|---------------------------------|
| 1  | Ladder                       |                                 |
| 2  | hTLR7 primers                | dH <sub>2</sub> O               |
| 3  |                              | Hz 1:10 1 µL                    |
| 4  |                              | Hz 1 µL                         |
| 5  |                              | supernatant 1 µL                |
| 6  |                              | 25 ng hDNA                      |
| 7  | hTRAM primers                | dH <sub>2</sub> O               |
| 8  |                              | Hz 1:10 1 µL                    |
| 9  |                              | Hz 1 µL                         |
| 10 |                              | supernatant 1 µL                |
| 11 |                              | 25 ng hDNA                      |
| 12 | Ladder                       |                                 |
| 13 | <i>P. falciparum</i> primers | dH <sub>2</sub> O               |
| 14 |                              | Hz 1:10 1 µL                    |
| 15 |                              | Hz 1 µL                         |
| 16 |                              | supernatant 1 µL                |
| 17 | <i>P. species</i> primers    | dH <sub>2</sub> O               |
| 18 |                              | Hz 1:10 1 µL                    |
| 19 |                              | Hz 1 µL                         |
| 20 |                              | supernatant 1 µL                |
| 21 | Ladder                       |                                 |
| 22 | MoCD14 primers               | dH <sub>2</sub> O               |
| 23 |                              | Hz 1:10 1 µL                    |
| 24 |                              | Hz 1 µL                         |
| 25 |                              | supernatant 1 µL                |
| 26 | MoCD14 primers               | dH <sub>2</sub> O + 25 ng MoDNA |
| 27 |                              | Hz 1:10 1 µL + 25 ng MoDNA      |
| 28 |                              | Hz 1 µL + 25 ng MoDNA           |
| 29 |                              | supernatant 1 µL + 25 ng MoDNA  |
