# Supplementary material
Source: PubMed Central journal article supplement (PMC1794278)
Supplement: pnas_0608745104_3.pdf [file pnas_0608745104_3.pdf]

Table 1. **Description of the malaria based CpG-like oligonucleotides**

| Name | Sequence                | Chromosomes (no. of repeats) | Genes                                       |
|------|-------------------------|------------------------------|---------------------------------------------|
| CpG1 | TCGTCGTCTTCGTCGTC*      | 4(4); 7(1); 8(1)             | VAR erythrocyte membrane protein 1 (PfEMP1) |
| GC1  | TGCTGCTCTTGCTGCTC*      | N/A                          | Negative control                            |
| CpG2 | TCGTCGTCGTCGTCGTC*      | 3(1); 6(1); 8(2)             | Hypothetical protein                        |
|      |                         |                              | VAR erythrocyte membrane protein 1 (PfEMP1) |
|      |                         |                              | VAR erythrocyte membrane protein 1 (PfEMP1) |
| GC2  | TGCTGCTGCTGCTGCTC*      | N/A                          | Negative control                            |
| 2007 | TCGTCGTTGTCGTTTTGTCGTT* | N/A                          | Type B human CpG positive control           |

\*Fully phosphorothioate backbone.
